# Supplementary material
Source: PubMed Central journal article supplement (PMC2879918)
Supplement: supp_mol.109.062018_Supplemental_Figure2.pdf [file supp_mol.109.062018_Supplemental_Figure2.pdf]

## Supplemental Figure 2

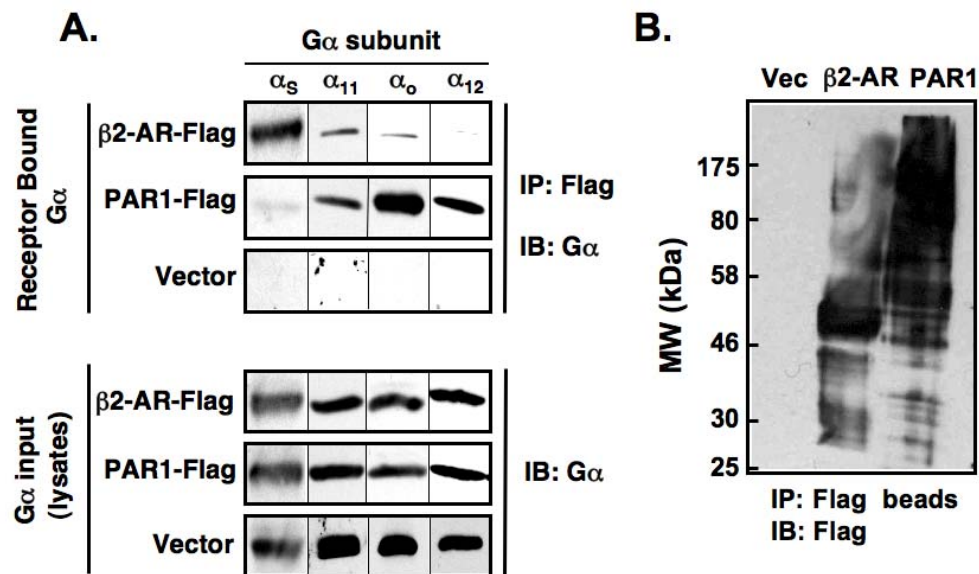

**Supplemental Figure 2.** The  $\beta$ 2-adrenergic receptor ( $\beta$ 2-AR) co-immunoprecipitates with distinct G proteins. Following a 24 h co-transfection of receptor and G protein pairs, cells were lysed, harvested, and sonicated in Tris Buffer. Proteins were extracted from membranes and immunoprecipitated overnight with anti-FLAG affinity gel. Immunoprecipitates were resolved by SDS-PAGE. Proteins were immunoblotted and visualized with ECL.
